# Supplementary material
Source: publisher figshare collection journal article supplement (https://tandf.figshare.com/articles/dataset/_/3310786)

# Supplementary Figure 1

**A**

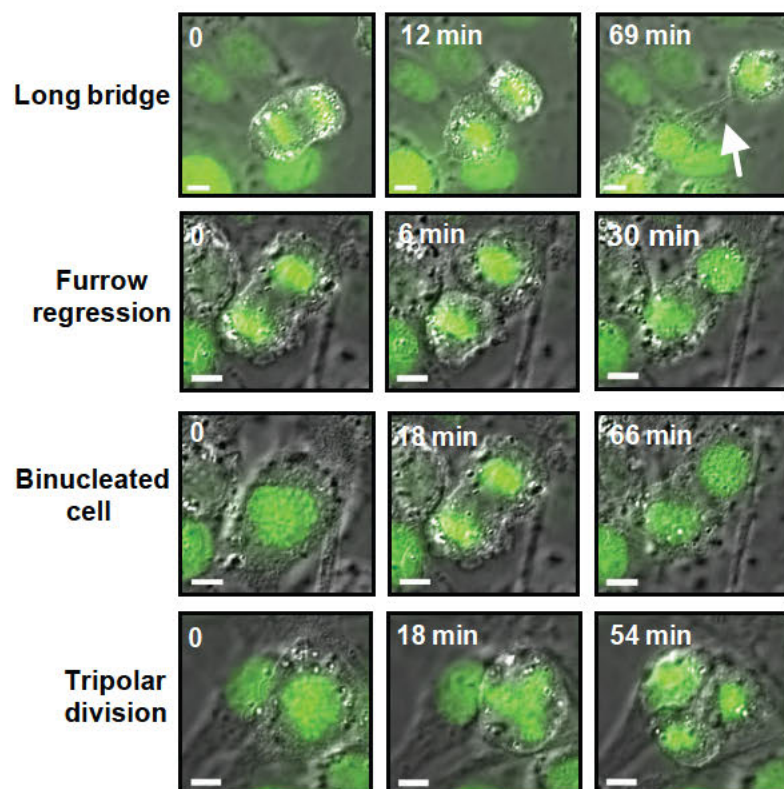

**B**

|                           | Vector<br>n=44<br>(%) | MEK1DD<br>n=80<br>(%) | H-Ras <sup>V12</sup><br>n=92<br>(%) |
|---------------------------|-----------------------|-----------------------|-------------------------------------|
| Long bridge<br>(> 60 min) | 0                     | 56.0                  | 62.2                                |
| Furrow<br>regression      | 2.2                   | 48.8                  | 63.0                                |
| Binucleated<br>cells      | 0                     | 26.3                  | 26.1                                |
| Tripolar<br>division      | 0                     | 1.3                   | 2.9                                 |

# Supplementary Figure 2

**A**

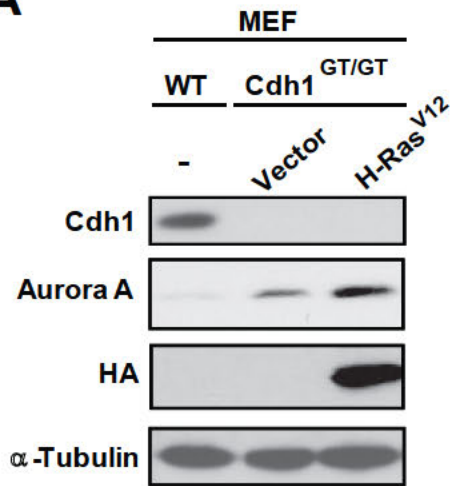

**C**

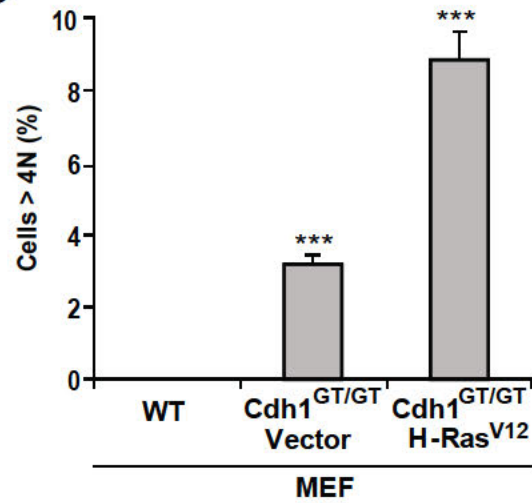

**B**

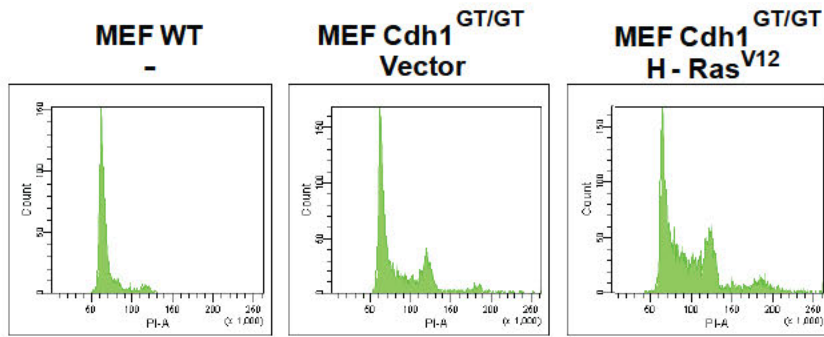

Supplementary Figure 3

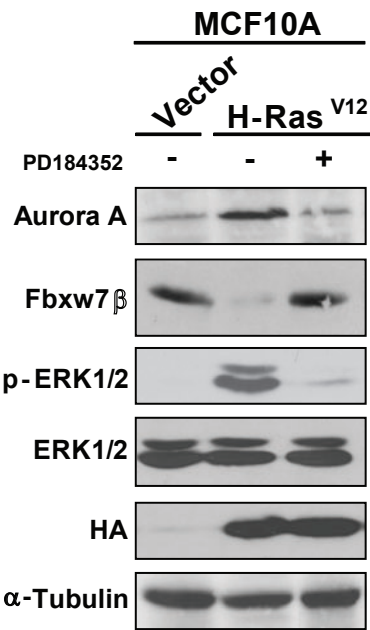

## Supplementary Figure 4

**A**

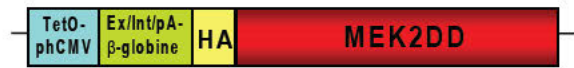

**B**

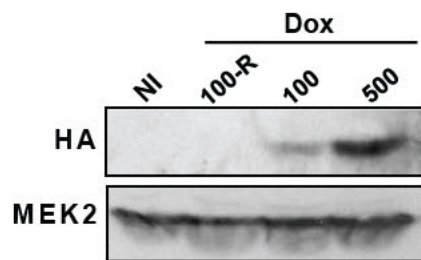

# Supplementary Figure 5

**A**

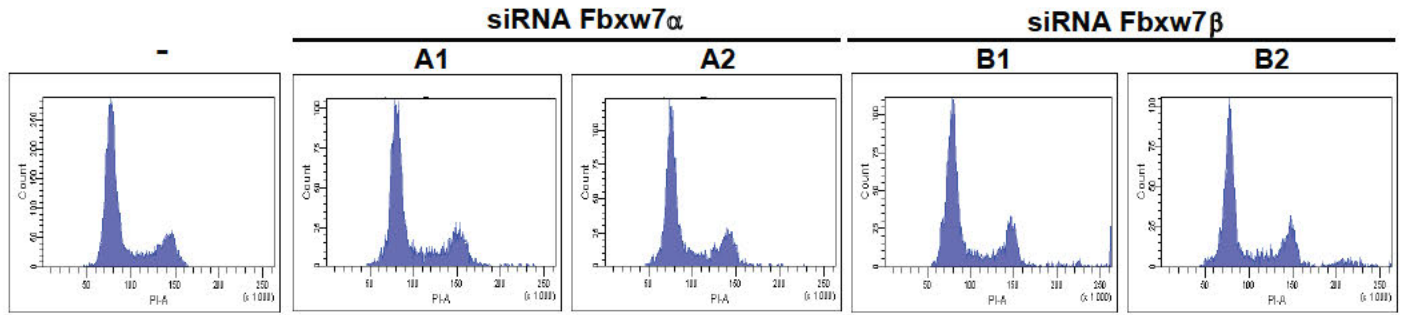

**B**

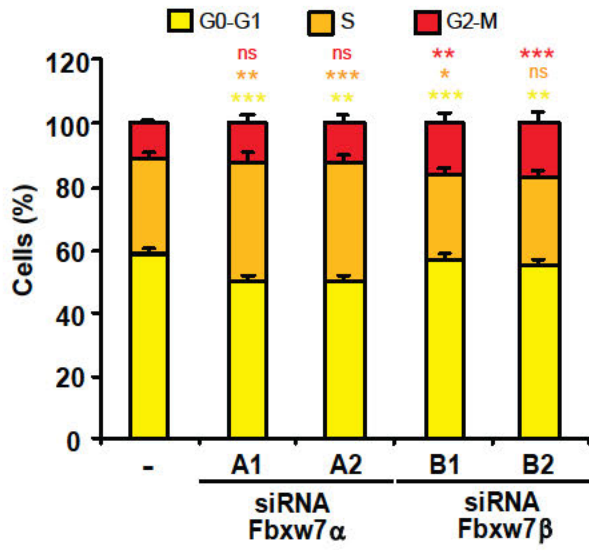

# Supplementary Figure 6

**A**

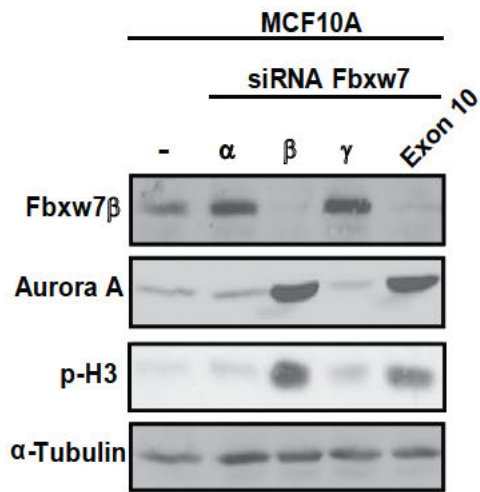

**B**

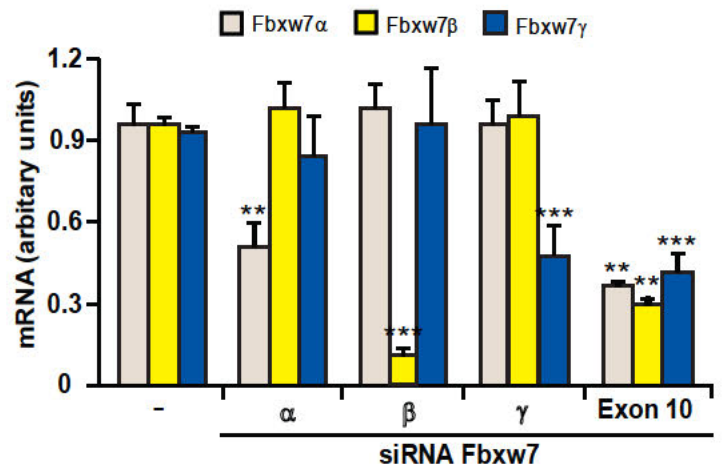

**C**

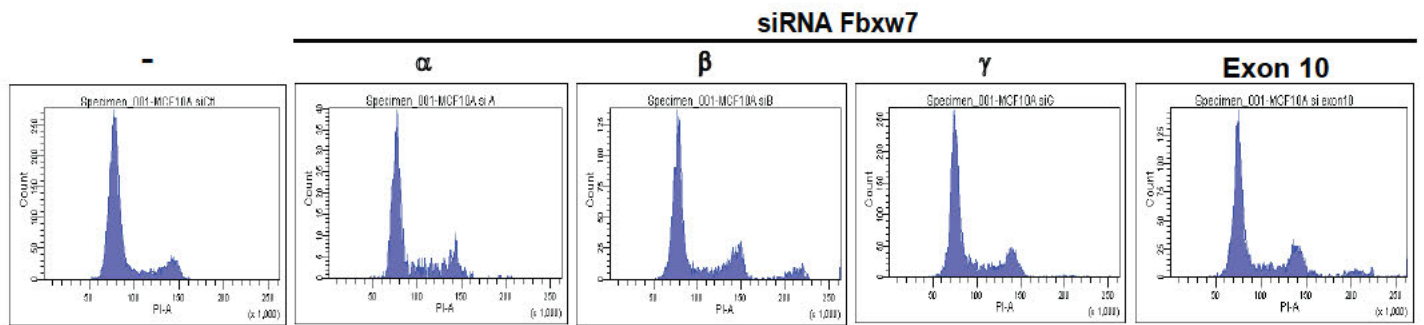

**D**

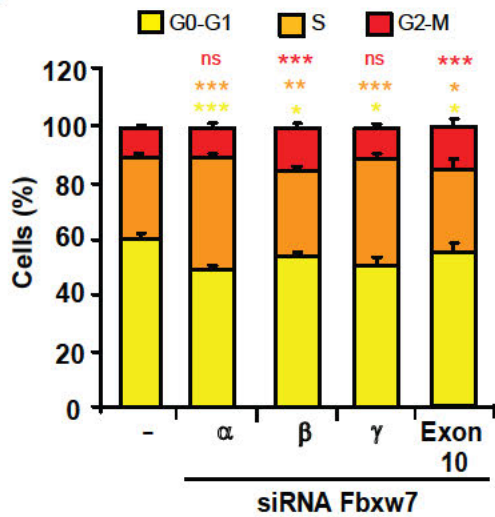

**E**

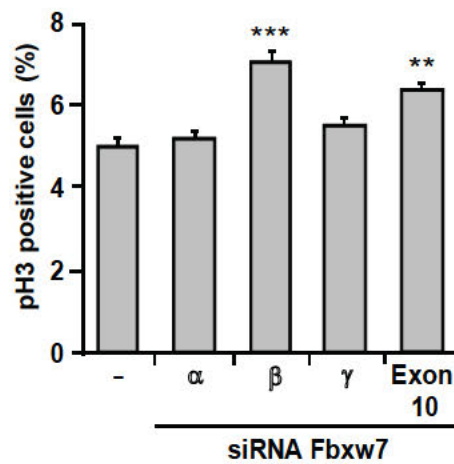

**F**

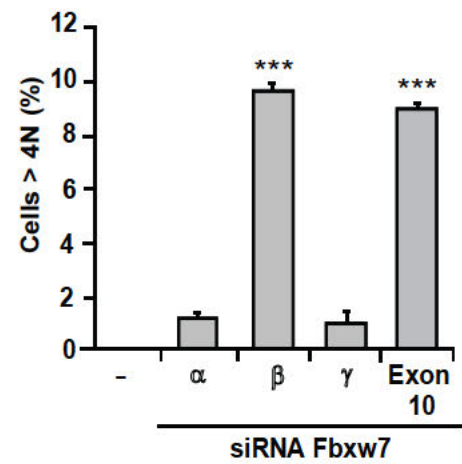

Supplement: Supplementary file 1 [file 1]
